# Supplementary material for: Detection of Acetaminophen and Its Glucuronide in Fingerprint by SALDI Mass Spectrometry Using Zeolite and Study of Time-Dependent Changes in Detected Ion Amount
Source: MDPI journal article supplement (doi:10.3390/analytica2030008), 2021-08-02
Supplement: s1 [file s1]

## Supporting Information

# Detection of Acetaminophen and Its Glucuronide in Fingerprint by SALDI Mass Spectrometry Using Zeolite and Study of Time-Dependent Changes in Detected Ion Amount

Toshiki Horikoshi <sup>1</sup>, Chihiro Kitaoka <sup>2</sup>, Yosuke Fujii <sup>3</sup>, Takashi Asano <sup>4</sup>, Jiawei Xu <sup>1,5</sup> and Tatsuya Fujino <sup>1,5\*</sup>

<sup>1</sup> Department of Applied Chemistry, Graduate School of Science and Engineering, Toyo University, 2100 Kujirai, Kawagoe 350-8585, Japan; s36d02100226@toyo.jp (T.H.); xu@toyo.jp (J.X.)

<sup>2</sup> Criminal Investigation Laboratory, Metropolitan Police Department, 2-1-1 Kasumigaseki, Chiyoda-ku, Tokyo 100-8929, Japan; kitaoka-chihiro@outlook.jp

<sup>3</sup> Department of Chemistry, Graduate School of Science and Engineering, Tokyo Metropolitan University, 1-1 Minami-Osawa, Hachioji, Tokyo 192-0379, Japan; yosuke.fujii.221@gmail.com

<sup>4</sup> Forensic Science Laboratory, Metropolitan Police Department, 2-1-1 Kasumigaseki, Chiyoda-ku, Tokyo 100-8929, Japan; asanofam@dc.mbn.or.jp

<sup>5</sup> Bio-Nano Electronics Research Centre, Toyo University, 2100 Kujirai, Kawagoe 350-8585, Japan

\* Correspondence: fujino048@toyo.jp

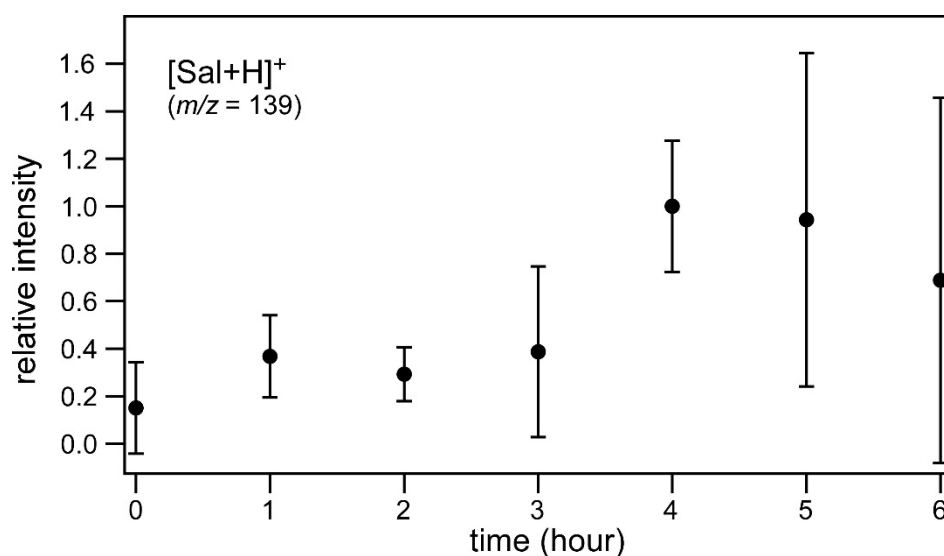

**Figure S1.** Time dependence of peak intensity at  $m/z = 139$ .
